# Supplementary material for: Directional character of solvent- and anion-pentafluorophenyl supramolecular interactions
Source: Royal Society of Chemistry journal article supplement (doi:10.1039/c2ce25192b), 2012-01-01

## Electronic Supplementary Information (ESI)

to the paper entitled

### Directional character of solvent- and anion-pentafluorophenyl supramolecular interactions.

by Tiddo J. Mooibroek, and Patrick Gamez

**Figure S1.**  $P_n^*$  vs.  $r$  bar charts for the molecule pairs involving the Cl-atoms of chloroform and a phenyl (grey bars) and pentafluorophenyl ring (black bars), within a 5 Å high and wide hemisphere. The red line symbolizes  $P_n^* = 1$  that is indicative of a random distribution of the hits.

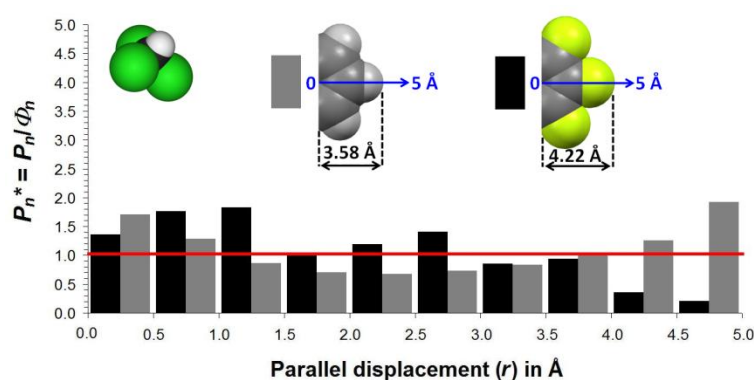

**Figure S2.**  $P_n^*$  vs.  $r$  bar charts for the molecule pairs involving the H-atoms of chloroform and a phenyl (white bars) and pentafluorophenyl ring (dashed bars), within a 5 Å high and wide hemisphere. The red line symbolizes  $P_n^* = 1$  that is indicative of a random distribution of the hits.

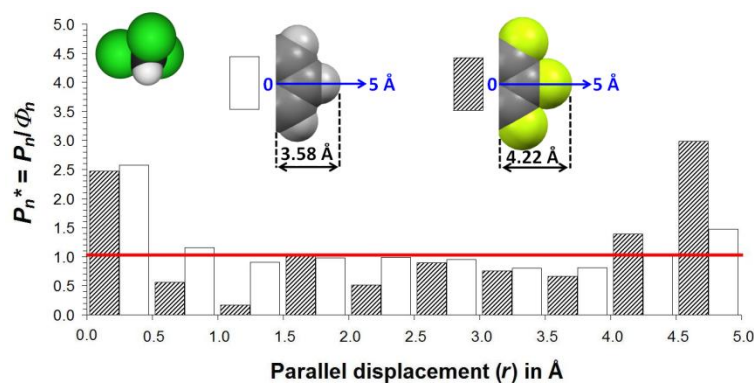

Supplement: c2ce25192b.pdf [file c2ce25192b.pdf]
